# Supplementary material for: Advancement toward ultra-thick and bright InGaN/GaN structures with a high number of QWs
Source: Royal Society of Chemistry journal article supplement (doi:10.1039/c8ce01830h), 2018-11-26

## XRD measurement of sample with 70xQWs

1) 2theta-omega scan of symmetric diffraction (002)

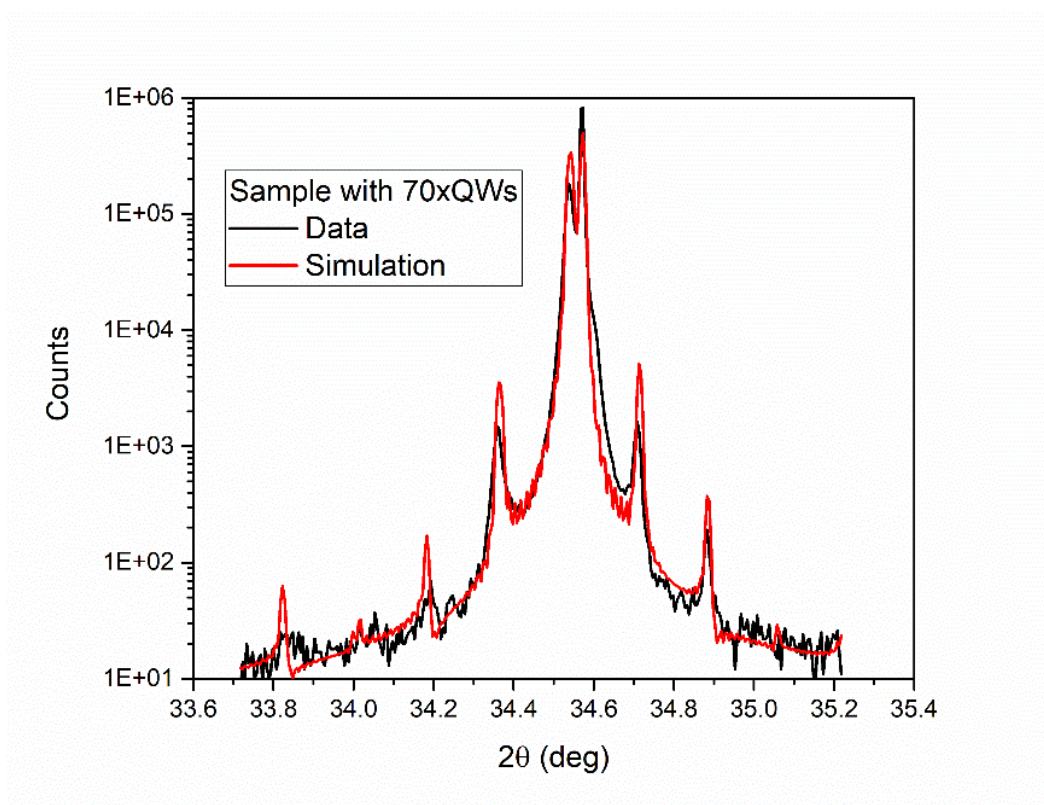

- Simulation results:
  - Periodicity = 6.65 nm
  - GaN thickness = 5 nm
  - InGaN thickness = 1.65 nm
  - $\text{In}_x\text{Ga}_{1-x}\text{N}$  composition:  $x = 3.8\%$

2) Reciprocal space map (RSM) of asymmetric diffraction (-114)

- GaN and InGaN peaks are vertically correlated (InGaN is fully strained to GaN buffer)
- No relaxation was observed

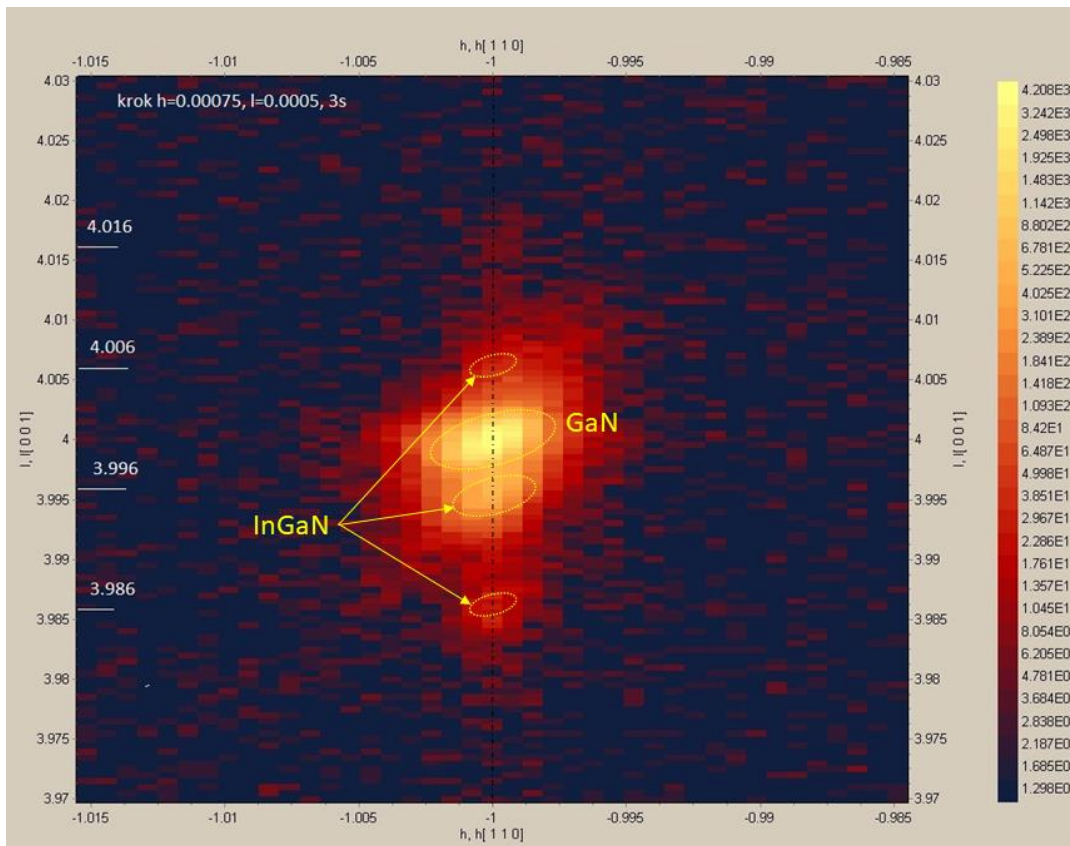

- L scan with 3 different configurations, position of InGaN peaks are marked similarly to RSM

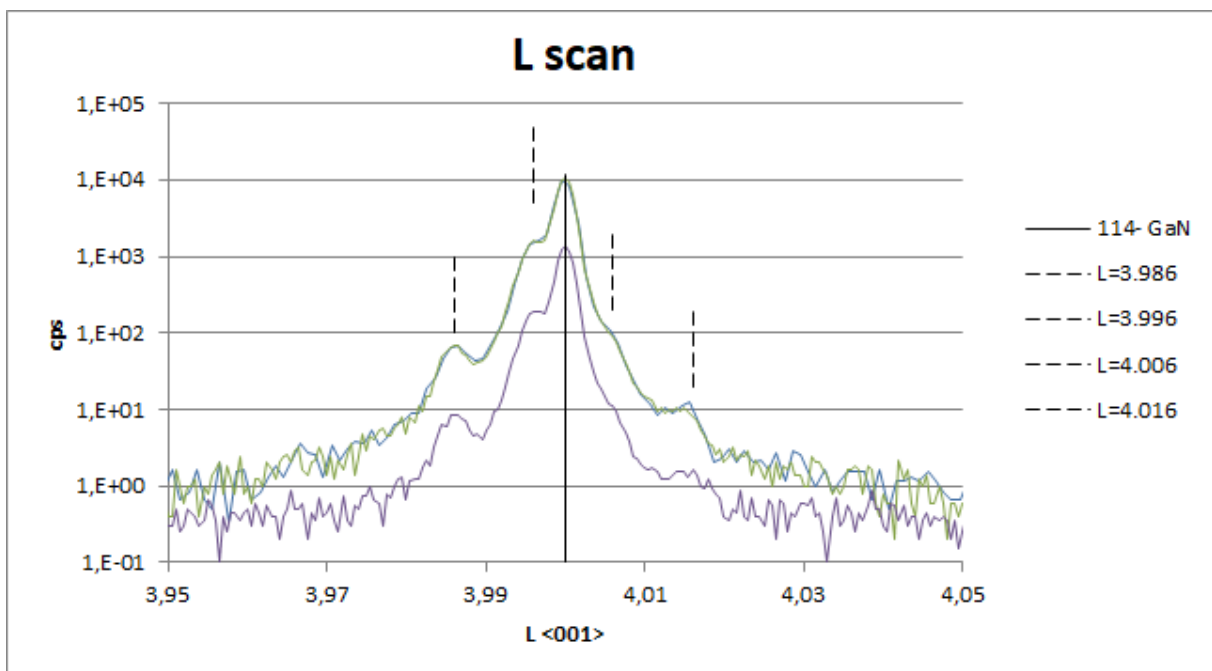

Supplement: c8ce01830h1.pdf [file c8ce01830h1.pdf]
